# Supplementary material for: The homeodomain-interacting protein kinase HPK-1 preserves protein homeostasis and longevity through master regulatory control of the HSF-1 chaperone network and TORC1-restricted autophagy in Caenorhabditis elegans
Source: PubMed Central journal article supplement (PMC5658188; doi:10.1371/journal.pgen.1007038), 2017-10-16
Supplement: pgen.1007038.s017.pdf [file pgen.1007038.s017.pdf]

Supplemental File 1: Additional images of AVS393 (*Phpk-1::GFP*) under unstressed condition or after heat stress

Unstressed

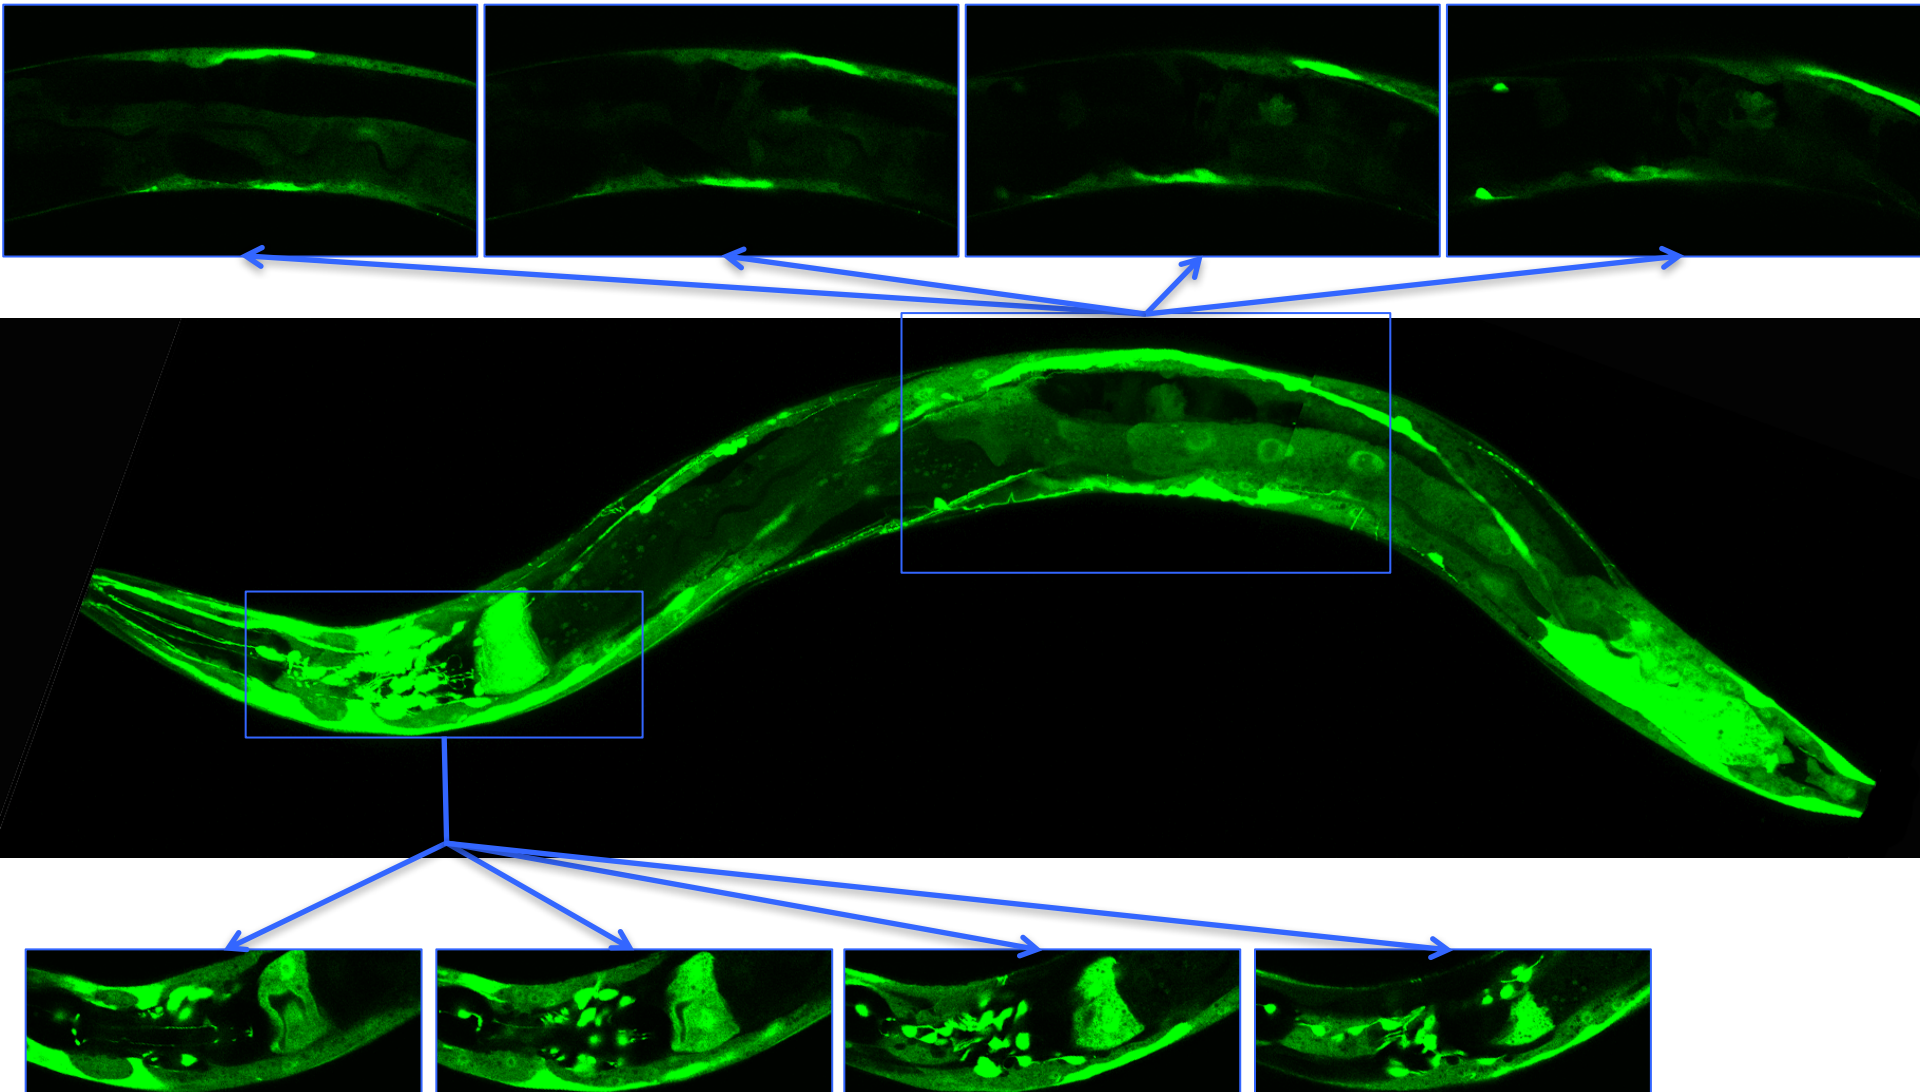

Middle: composite of three images with all stacks (max).

Top/Bottom: Individual z stack of highlighted regions

# Unstressed

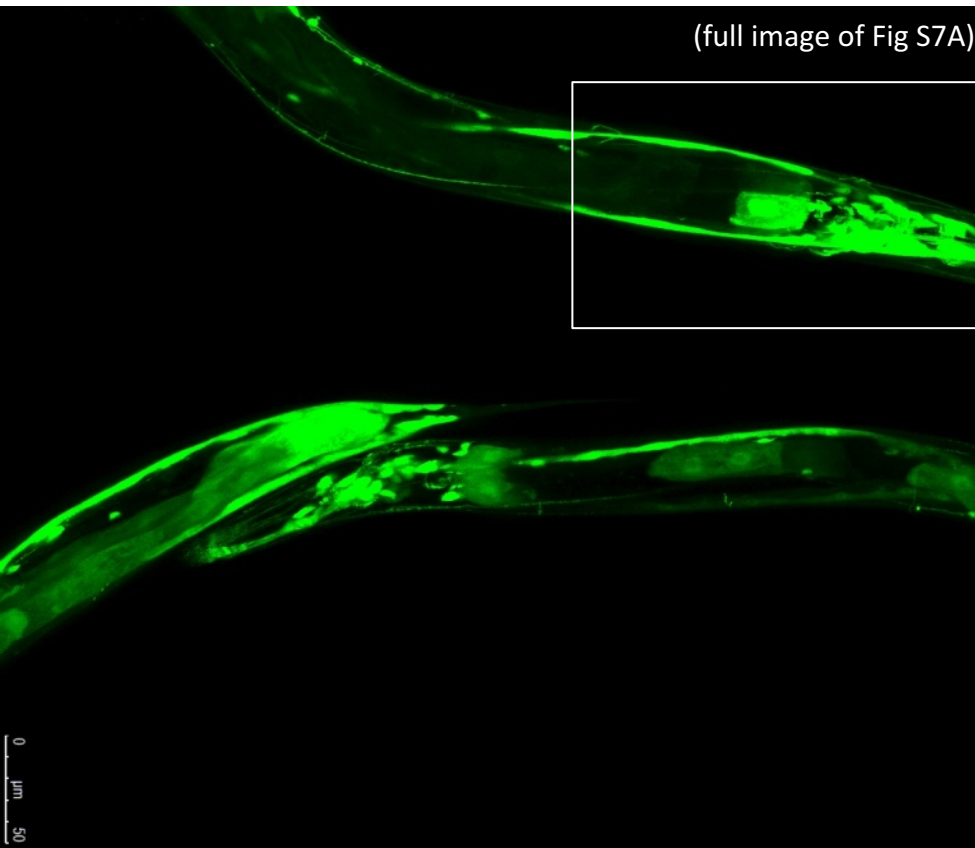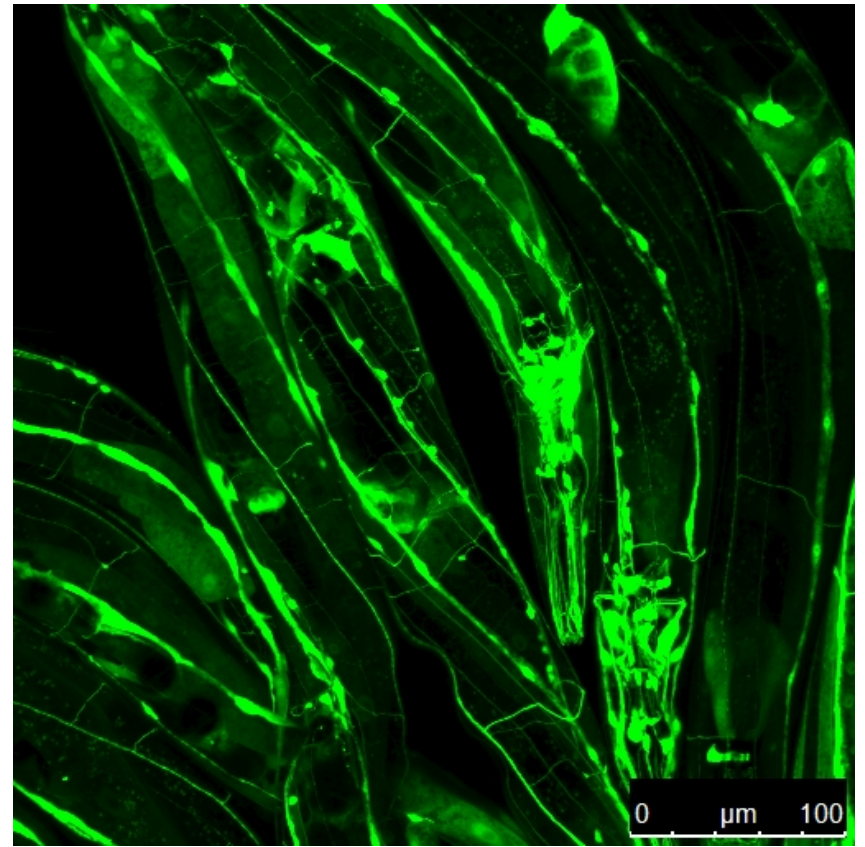

# Heat shock

(full image of Fig S7B)

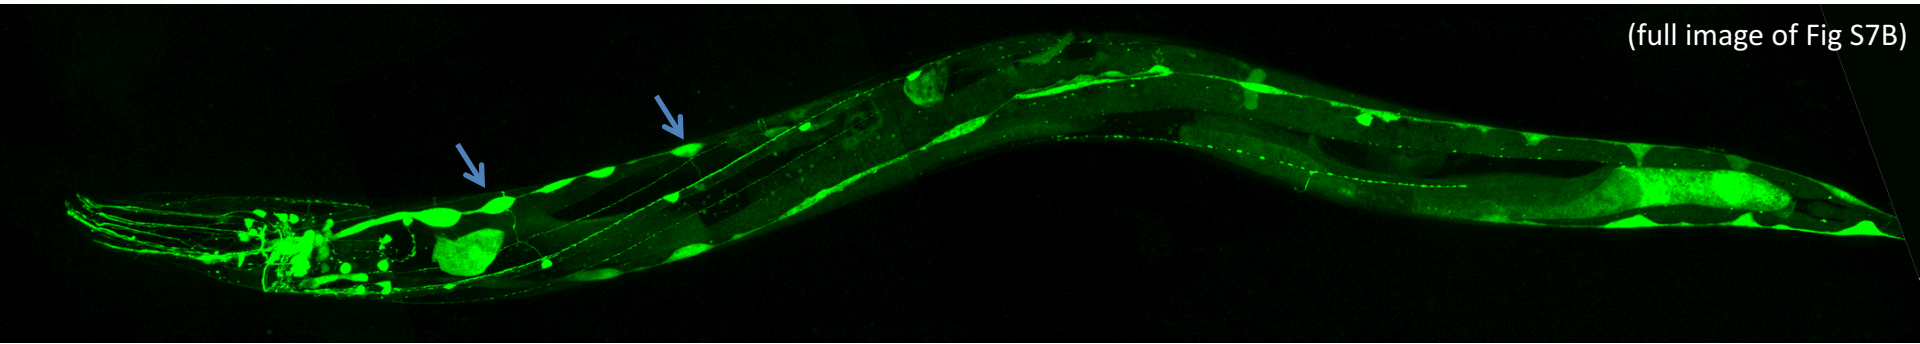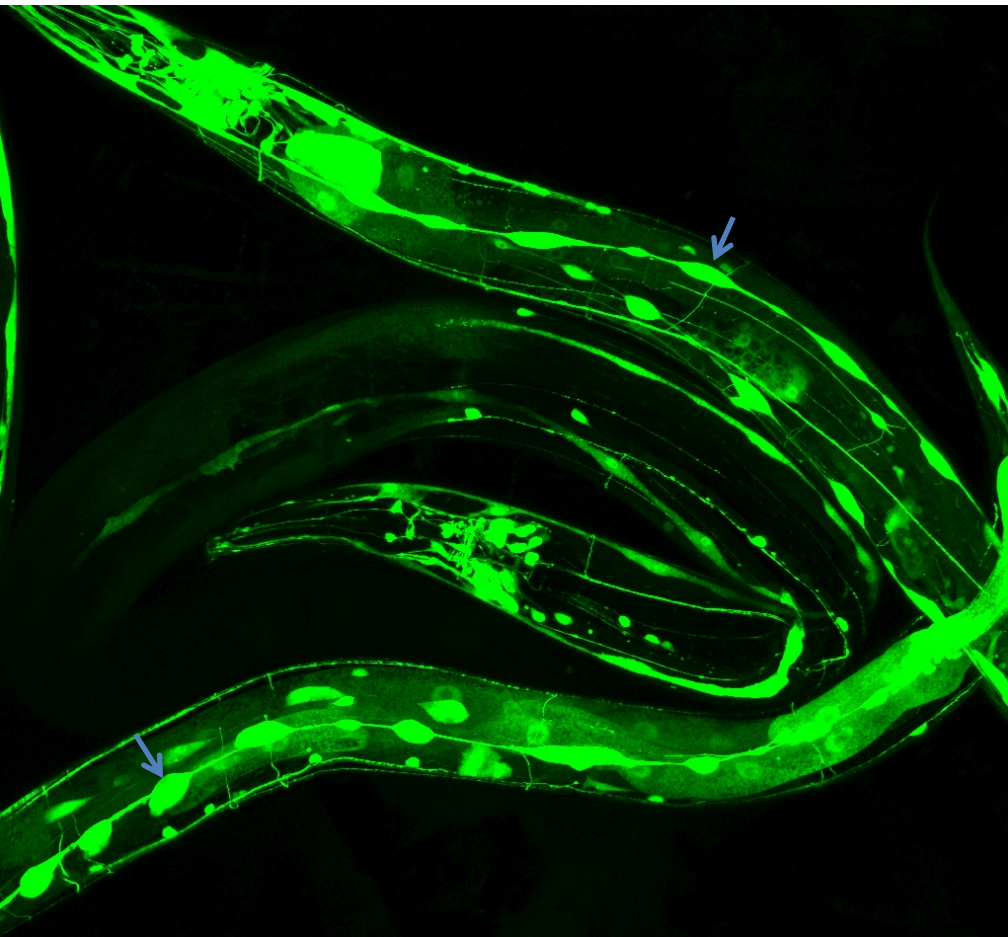

AVS393: *artEx11[Phpk-1::GFP+ pRF4(rol-6(su1006))]*

0  $\mu\text{m}$  50

- Under unstressed conditions *Phpk-1::GFP* expression is within hypodermal seam cells (1<sup>st</sup> slide).
- After heat shock *Phpk-1::GFP* expression reveals that seam cells appear larger and swollen (2<sup>nd</sup> slide).
- Animals appear “twisted” in images due to the *rol-6* mutation

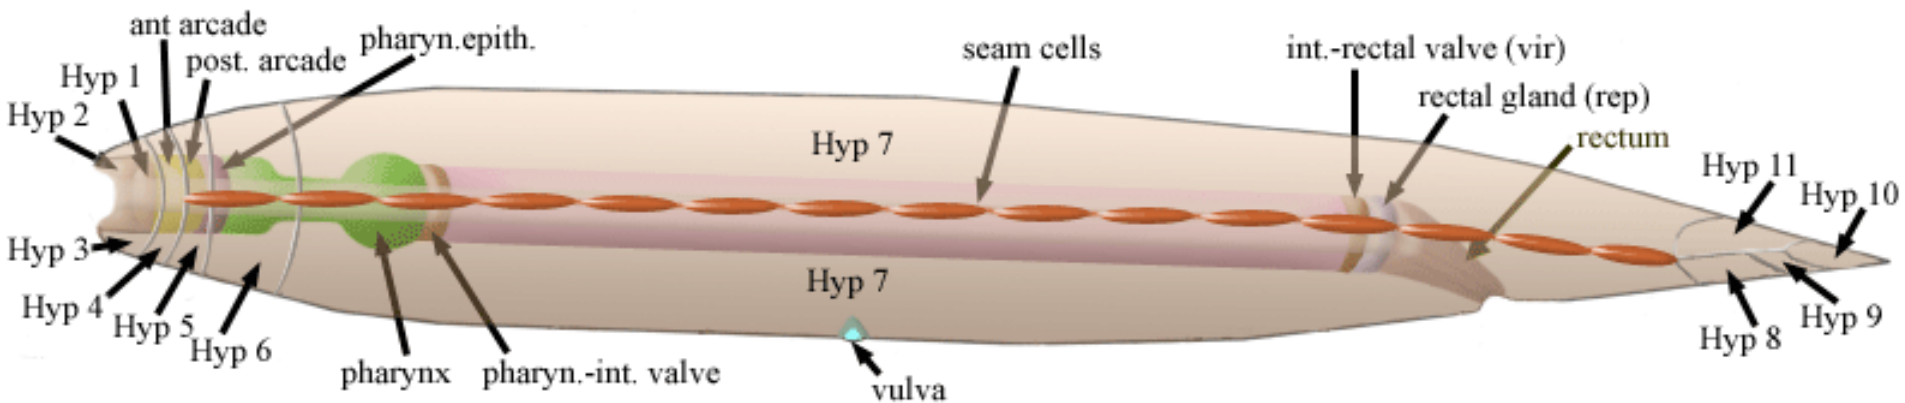

Hypodermis in the adult hermaphrodite

HypFIG3
